# Supplementary material for: Pseudo-ternary LiBH4·LiCl·P2S5 system as structurally disordered bulk electrolyte for all-solid-state lithium batteries
Source: Royal Society of Chemistry journal article supplement (doi:10.1039/d0cp01334j), 2020-01-01
Supplement: d0cp01334j1.pdf [file d0cp01334j1.pdf]

## Supplementary information

### Pseudo-ternary $\text{LiBH}_4\cdot\text{LiCl}\cdot\text{P}_2\text{S}_5$ system as structurally disordered bulk electrolyte for all-solid-state lithium batteries

A. El Kharbachi,<sup>a,b</sup> J. Wind,<sup>a,c</sup> A. Ruud,<sup>c</sup> A.B. Høgset,<sup>a</sup> M.M. Nygård,<sup>a</sup> J. Zhang,<sup>d</sup>  
M.H. Sørby,<sup>a</sup> S. Kim,<sup>e</sup> F. Cuevas,<sup>d</sup> S. Orimo,<sup>e,f</sup> M. Fichtner,<sup>b,g</sup> M. Latroche,<sup>d</sup> H.  
Fjellvåg,<sup>c</sup> B.C. Hauback<sup>a</sup>

<sup>(a)</sup> Institute for Energy Technology (IFE), P.O. Box 40, NO-2027 Kjeller, Norway

<sup>(b)</sup> Helmholtz Institute Ulm (HIU) Electrochemical Energy Storage, Helmholtzstr. 11, 89081 Ulm,  
Germany

<sup>(c)</sup> Centre for Materials Science and Nanotechnology, University of Oslo, P.O. Box 1126, Blindern,  
NO-0318 Oslo, Norway

<sup>(d)</sup> Univ Paris Est Creteil, CNRS, ICMPE, UMR7182, F-94320, Thiais, France

<sup>(e)</sup> Institute for Materials Research, Tohoku University, Sendai 980-8577, Japan

<sup>(f)</sup> WPI-Advanced Institute for Materials Research, Tohoku University, Sendai 980-8577, Japan

<sup>(g)</sup> Institute of Nanotechnology, Karlsruhe Institute of Technology (KIT), P.O. Box 3640, 76021  
Karlsruhe, Germany

## Experimental

Lab-PXD data were obtained with a Bruker AXS D8 Advance diffractometer equipped with a Göbel mirror and a LynxEye 1D strip detector. The patterns were obtained in a Debye–Scherrer geometry using Cu K $\alpha$  radiation (1.5418 Å) and rotating glass capillaries, filled and sealed under Ar atmosphere. Phase identification from the PXD data was performed using the DIFFRAC.SUITE EVA software with the PDF-4 database.

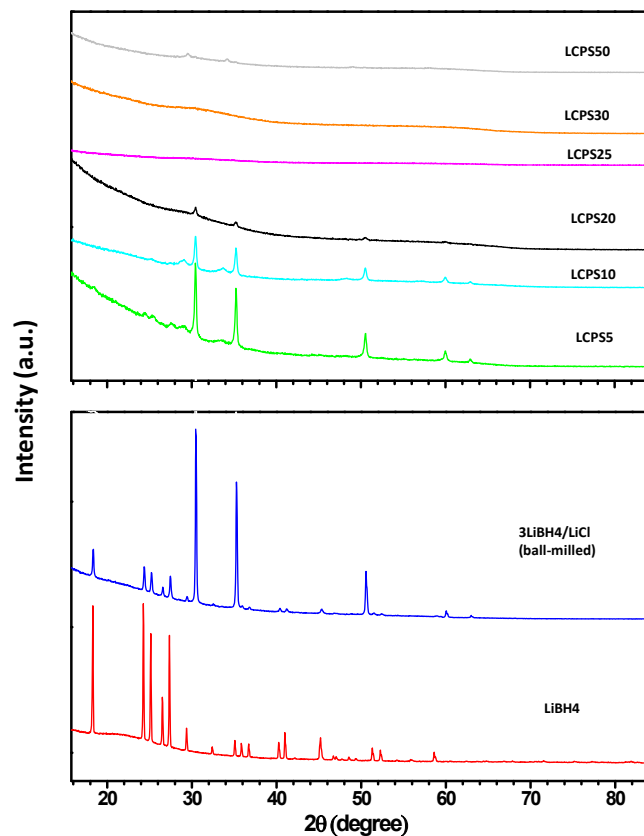

**Figure S1.** Lab-PXD patterns ( $\text{Cu } K_{\alpha}$ ,  $1.5418 \text{ \AA}$ ) of  $\text{LiBH}_4$ , ball-milled  $3\text{LiBH}_4\text{-LiCl}$ , and in the top figure  $\text{LiBH}_4\text{-LiCl-P}_2\text{S}_5$  based mixed systems and further ball-milling with Spex milling; e.g. LCPS5 corresponds to  $95(3\text{LiBH}_4/\text{LiCl}) - 5\text{P}_2\text{S}_5$ , and similar for the other compositions.

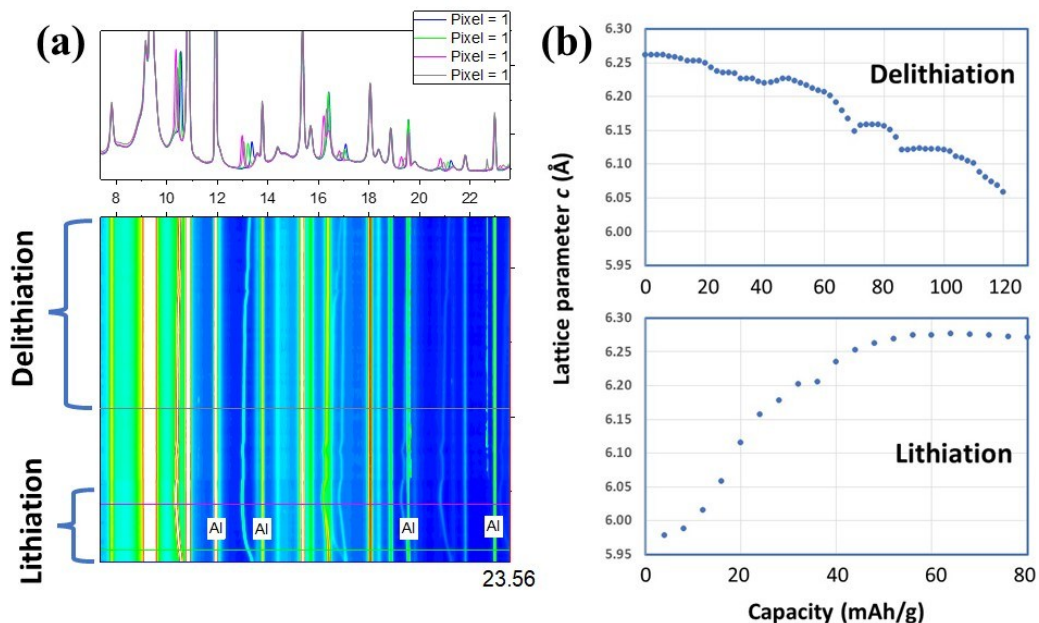

**Figure S2.** (a) 2D *in-operando* SR-PXD patterns of LCPS10-based battery cell during 1 cycle using  $\text{TiS}_2$  electrode (extracted 1D pattern is shown on the top); (b) evolution of the *c*-axis during lithiation/delithiation of  $\text{TiS}_2$ . The cell was relaxed after lithiation for few hours while the PXD data are continuously collected.
